# Supplementary material
Source: publisher figshare collection journal article supplement (https://karger.figshare.com/articles/dataset/_/12046146)
Supplement: Supplementary file 2 [file 1]

Archive with 7 entries (7 files):
- Manuscript-Manuscript_revised_second_version_Couvelard_1.docx
- Supplementary material-Suppl_Figure_1.tif
- Supplementary material-Suppl_Figure_2.pdf
- Supplementary material-Suppl_Figure_3.tif
- Supplementary material-Suppl_Figure_4.tif
- Supplementary material-Suppl_Figure_5.tif
- Supplementary material-Suppl_Table_1.docx
