# Supplementary material
Source: publisher figshare collection journal article supplement (https://karger.figshare.com/articles/dataset/_/12046146)
Supplement: Supplementary file 2 [file 1 › Manuscript-Manuscript_revised_second_version_Couvelard_1.docx]

**SPECIFIC GENOMIC ALTERATIONS IN HIGH GRADE PULMONARY NEUROENDOCRINE TUMOURS WITH CARCINOID MORPHOLOGY**

Jerôme Cros (1,2,3), Nathalie Théou-Anton (), Valérie Gounant (5), Remy Nicolle (6), Cécile Reyes (7), Sarah Humez (8), Ségolène Hescot (9), Vincent Thomas de Montpréville (10), Serge Guyetant (11), Jean-Yves Scoazec (12), Alice Guyard (1), Louis de Mestier (13,2,3), Solenn Brosseau (2,5), Pierre Mordant (2,14) Yves Castier (2,14), David Gentien (7), Philippe Ruszniewski (2,3,13), Gérard Zalcman (2,5), Anne Couvelard* (1,2,3), Aurélie Cazes (1,2,15)

1. Department of Pathology, ENETS Centre of Excellence, Beaujon-Bichat Hospitals, AP-HP, Clichy/Paris, France
2. Université de Paris, Paris, France
3. INSERM U1149, Centre de Recherche sur l’Inflammation, Clichy/Paris, France
4. Department of Genetics, Bichat Hospital, AP-HP, Paris, France
5. Department of Thoracic Oncology, & Early phase clinical trials Unit (CIC1425/CLIP2), Bichat Hospital, AP-HP
6. Programme Cartes d'Identité des Tumeurs (CIT), Ligue Nationale Contre le Cancer, Paris, France.
7. Institut Curie, PSL Research University, Translational Research Department, Genomics platform, Paris, France
8. Department of Pathology, CHRU de Lille, Lille, France
9. Department of Nuclear Medicine, Institut Curie, CLCC, Saint-Cloud, France
10. Department of Pathology, Marie Lannelongue Hospital, Le Plessis Robinson, France
11. Department of pathology, CHRU de TOURS, Tours, France.
12. Department of Biopathology, Gustave Roussy Cancer Campus, Villejuif, France; Université Paris Saclay, Faculté de Médecine, Le Kremlin-Bicêtre
13. Department of Gastroenterology and Pancreatology, Beaujon Hospital, AP-HP –Clichy, France
14. Department of Vascular and Thoracic Surgery, Bichat University Hospital, AP-HP – Université de Paris, Paris, France
15. INSERM U1152, Paris, France

Short title: Genomic landscape of high grade carcinoids

*Corresponding Author:

Pr Anne Couvelard, Pathology Department, Bichat Hospital, 46 rue Henri Huchard, 75018 Paris, tel: 0033140258012, [anne.couvelard@aphp.fr](mailto:anne.couvelard@aphp.fr)

Keywords: lung neuroendocrine tumour, carcinoid, high grade, CGH, RB

**Supplementary Fig. 1.** Morphology and proliferation assessed by Ki-67 expression in the 11 high grade NET with carcinoid morphology (a, b: patient 1; c, d: patient 2; e, f: patient 3; g, h: patient 4; i, j: patient 5; k, l: patient 6; m, n: patient 7; o, p: patient 8; q, r: patient 9; s, t: patient 10; u, v: patient 11).

All samples have a carcinoid morphology on HE (a, c, e, g, i, k, m, o, q, s, u) with high grade Ki-67 proliferation (b: 37%, d: 24%, f: 41%, h: 21%, j: 27%, l: 22%, n: 27%, p: 31%, r: 44%, t: 56%, v: 24%).

**Supplementary Figure 2**: CGH profiles of high grade tumours in the eleven patients

**Supplementary Fig. 3**: Comparison of CGH profiles, morphology and immunohistochemistry in paired samples of patient 7.

The tumour contains areas of low and high grade, both with a carcinoid morphology. CGH profiles showed in the low grade areas (sample 7a) very complex genetic losses in chromosomes 3, 8, 11, 16 and 22 suggesting chromosomal instability. In high grade areas (7b) there was a probable genomic duplication accompanied by additional complex chromosomal rearrangement/gain/loss.

**Supplementary Fig. 4:** Comparison of CGH profiles, morphology and immunohistochemistry in paired samples of patient 9.

The tumour contains areas of low and high grade, both with a carcinoid morphology. CGH profiles showed in the low grade areas (sample 9a) an already severely disturbed genome with multiple gains and losses, albeit with different bAF suggesting a clonal heterogeneity and chimotrypsis of chromosomes 11&12. Comparison with high grade revealed a probable genomic duplication with further rearrangements of chromosomes 11&12.

**Supplementary Fig. 5**: Comparison of CGH profiles, morphology and immunohistochemistry in paired samples of patient 11.

The high grade biopsy (sample 11a) and surgical specimen (sample 11b) had similar CGH profiles, but better seen in the surgical specimen such as the complete LOH of Chr1-2-3. Of interest, there was an additional deep deletion of Chr9 in surgical specimen (arrow).
