# Supplementary material
Source: publisher figshare collection journal article supplement (https://karger.figshare.com/articles/dataset/_/12046146)
Supplement: Supplementary file 2 [file 1 › Supplementary material-Suppl_Table_1.docx]

| **Supplementary Table 1: Gene mutations in high grade samples**  AF: allelic frequency; HGVSc: Human genome variation society (coding sequence variation) | | | |
| --- | --- | --- | --- |
| **Patients** | **Gene mutations** | **AF** | **HGVSc** |
| 1 | ARID1A | 0.51 | c.4304A>G |
| 2 |  |  |  |
| 3 | ATM | 0.54 | c.790delT |
| 4 | | TSC2 | | --- | | FANCI | | KIT | | RAD50 | | PIK3CA | | | 0.55 | | --- | | 0.51 | | 0.49 | | 0.47 | | 0.31 | | | c.251C>A | | --- | | c.1112G>A | | c.1232-4G>A | | c.2177G>A | | c.3140A>G | |
| 5 | | ATM | | --- | | SMARCA4 | | CCND2 | | | 59 | | --- | | 6 | | 7 | | | c.1261T>C | | --- | | c.4413G>C | | c.433G>A | |
| 6 | | CREBBP | | --- | | PTEN | | RAD50 | | TSC2 | | KRAS | | MAGOH | | ERBB3 | | | 48 | | --- | | 81 | | 48 | | 50 | | 5 | | 10 | | 5 | | | c.6763C>T | | --- | | c.638_655delinsTGCA | | c.1556G>A | | c.4438T>G | | c.230G>A | | c.349G>A | | c.307C>T | |
| 7 | RB1 | 0.66 | c.1574C>G |
| 8 | | TSC1 | | --- | | TP53 | | | 24 | | --- | | 53 | | | c.93delG | | --- | | c.487T>A | |
| 9 | | PTCH1 | | --- | |  | | | 84 | | --- | | | c.1783A>C | | --- | |  | |
| 10 | TP53 | 0.43 | c.707_708 Delins TA |
| 11 | | PTEN | | --- | | | 0.4 | | --- | | | c.464A>G | | --- | |
