# Supplementary material
Source: publisher figshare collection journal article supplement (https://karger.figshare.com/articles/dataset/_/12046146)

Sample 1

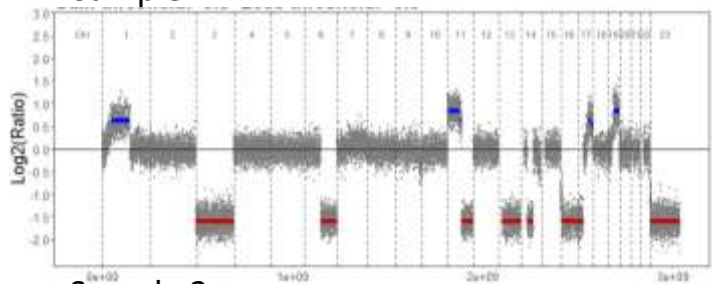

Sample 2

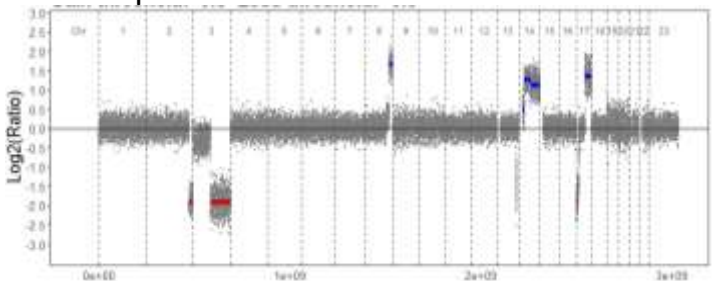

Sample 3

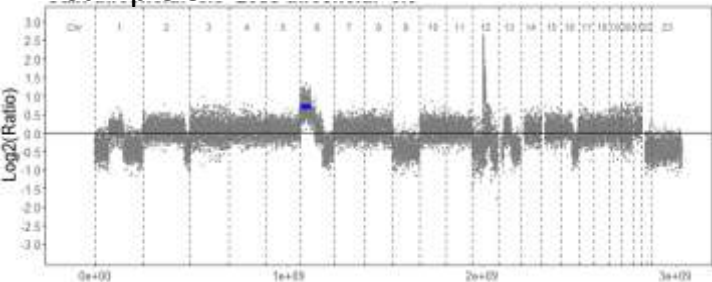

Sample 4

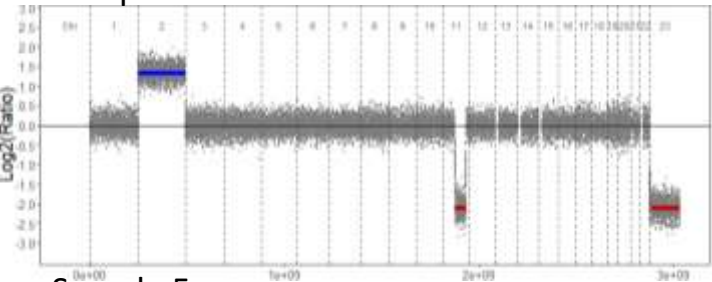

Sample 5

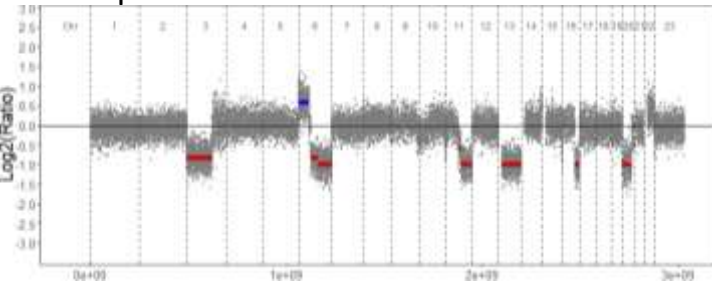

Sample 6

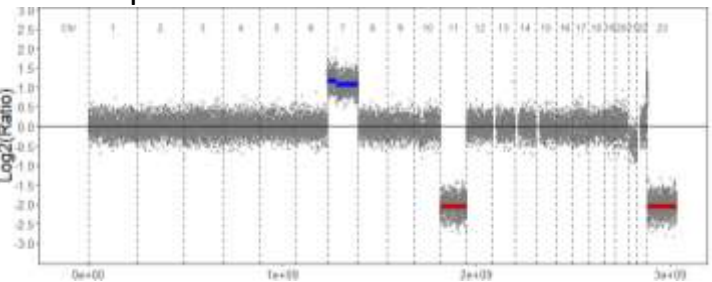

Sample 7b

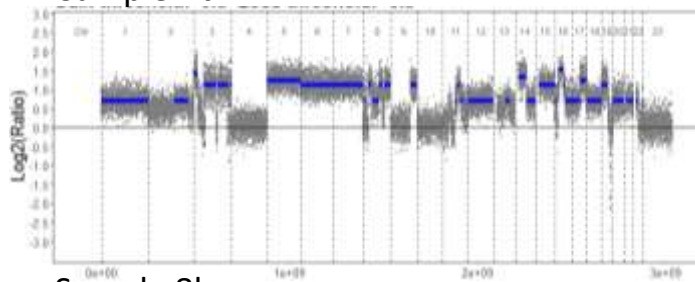

Sample 8b

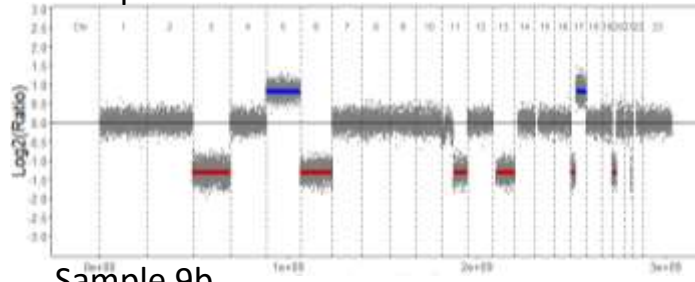

Sample 9b

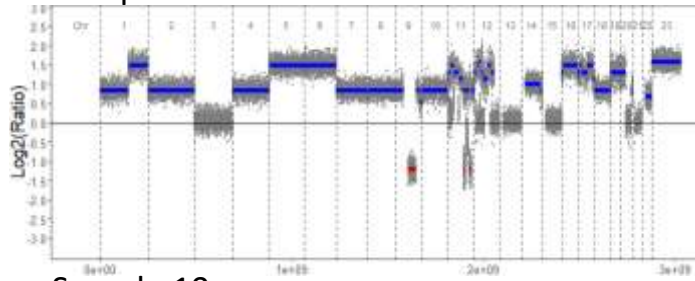

Sample 10c

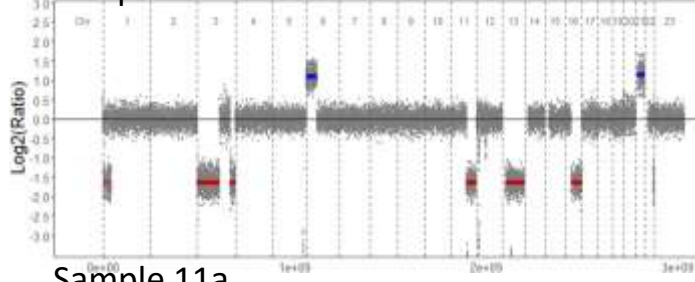

Sample 11a

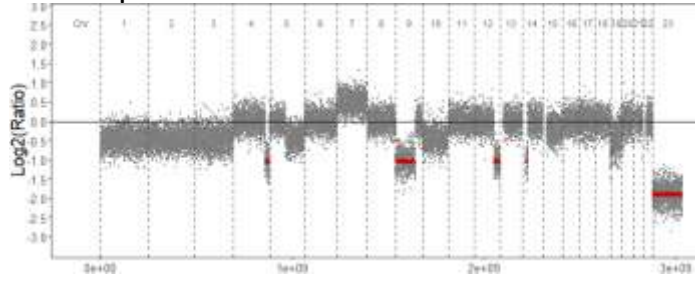

Supplement: Supplementary file 1 [file 1]

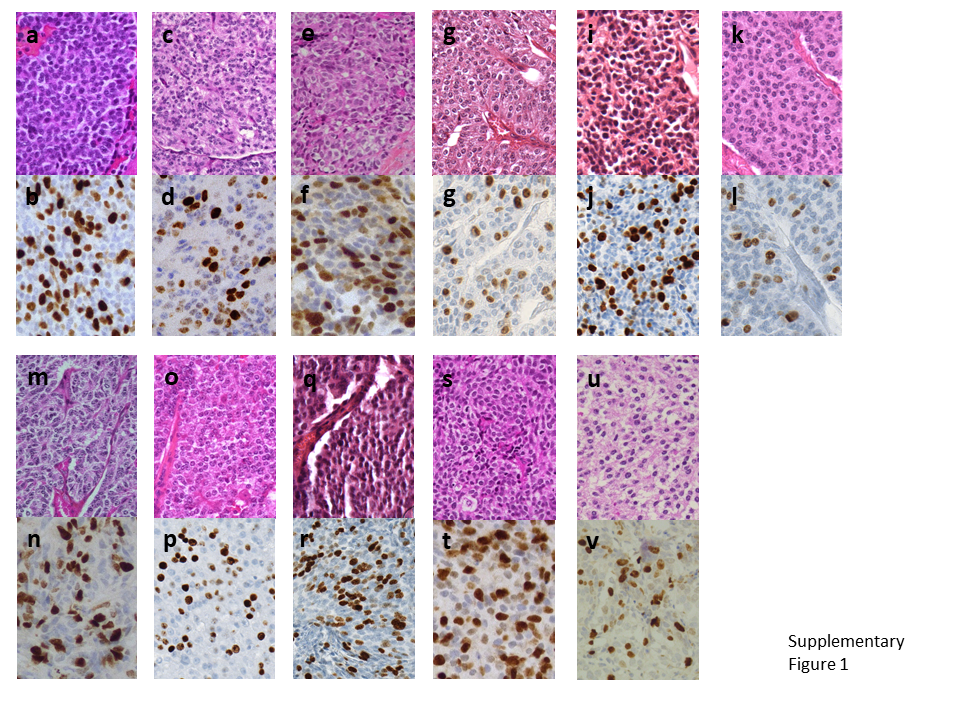

Supplement: Supplementary file 2 [file 1 › Supplementary material-Suppl_Figure_1.tif]

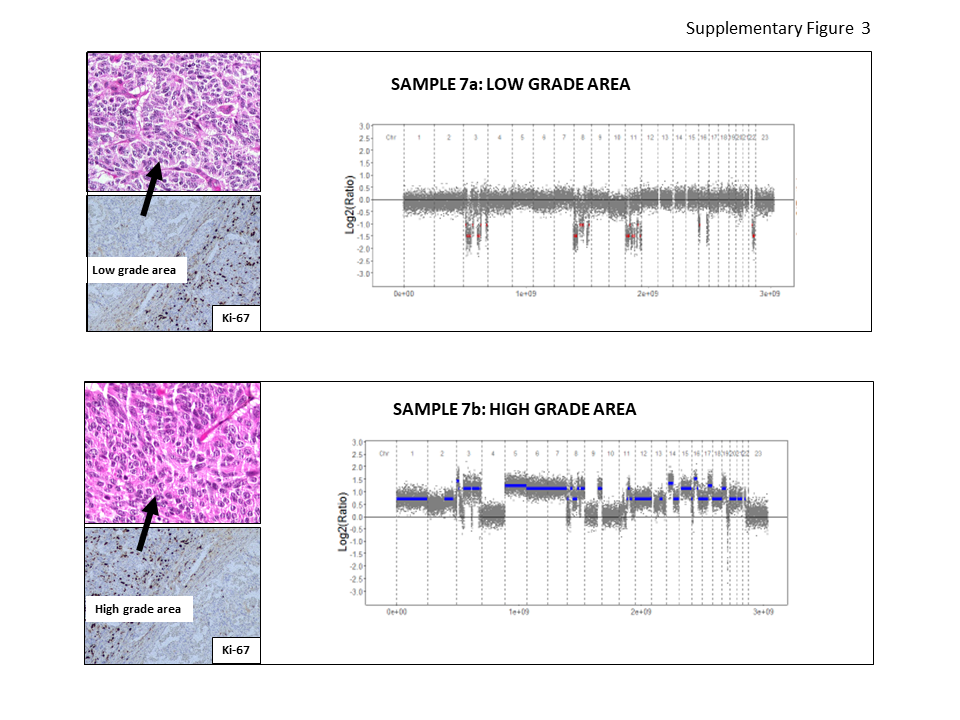

Supplement: Supplementary file 2 [file 1 › Supplementary material-Suppl_Figure_3.tif]

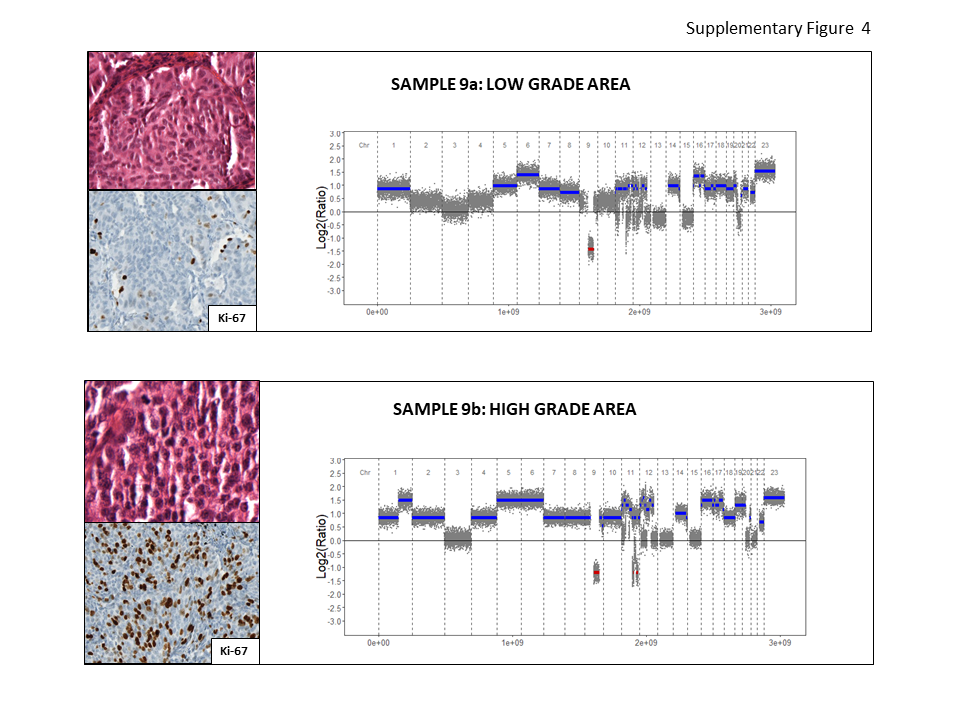

Supplement: Supplementary file 2 [file 1 › Supplementary material-Suppl_Figure_4.tif]

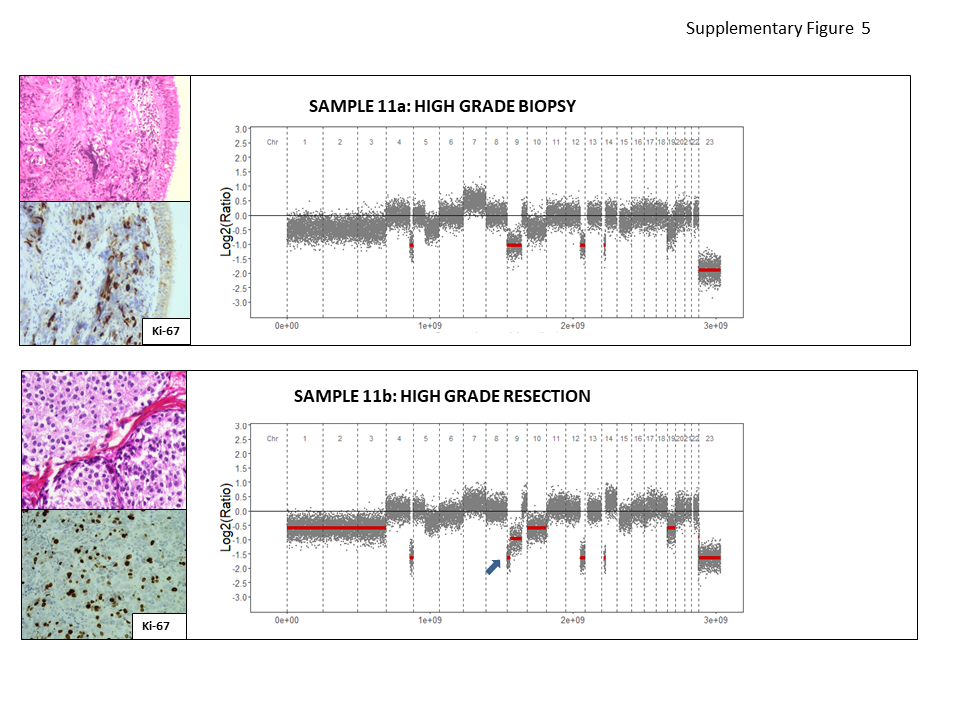

Supplement: Supplementary file 2 [file 1 › Supplementary material-Suppl_Figure_5.tif]
